# Supplementary material for: Receptor conversion impacts outcomes of different molecular subtypes of primary breast cancer
Source: PubMed Central journal article supplement — Ther Adv Med Oncol. 2021 May 6;13:17588359211012982. doi: 10.1177/17588359211012982 (PMC8111518; doi:10.1177/17588359211012982), 2021-05-06
Supplement: sj-pdf-1-tam-10.1177_17588359211012982.pdf [file sj-pdf-1-tam-10.1177_17588359211012982.pdf]

Figure A1 A flow chart of this cohort

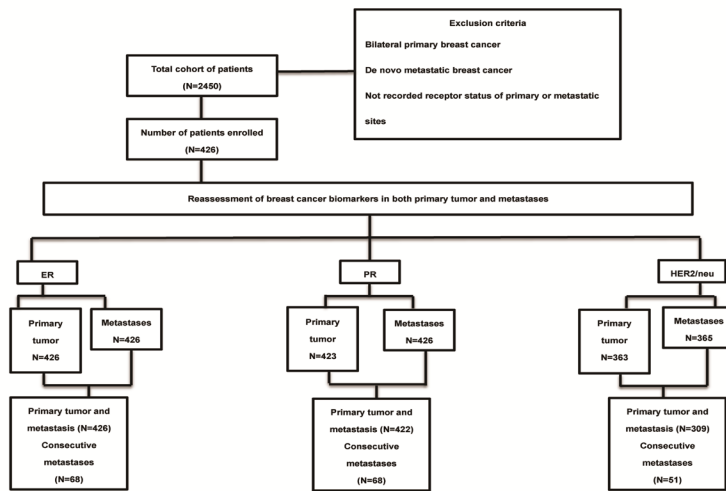

Figure. A2 Progression-free survival analysis stratified by HER2 status in metastasis and first-line anti-HER2 therapy

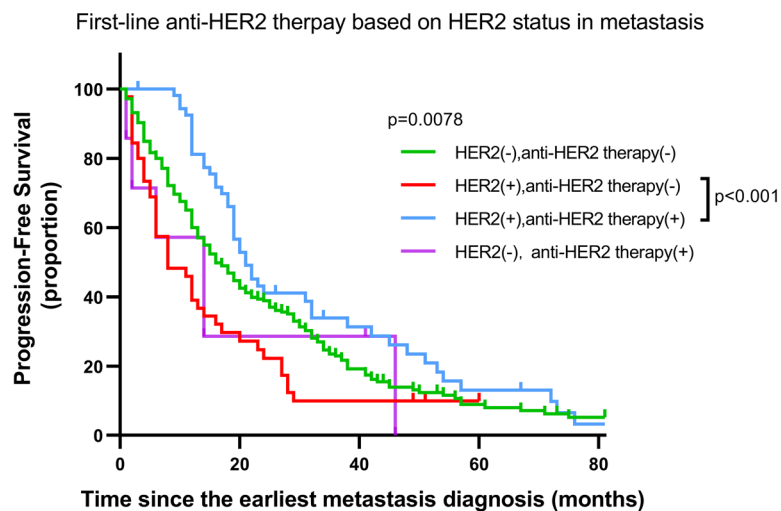

No. at risk

|                                        |     |     |    |    |   |
|----------------------------------------|-----|-----|----|----|---|
| HER2(-), anti-HER2 therapy(-)          | 249 | 108 | 31 | 12 | 5 |
| HER2(-), anti-HER2 targeted therapy(+) | 7   | 4   | 0  | 0  | 0 |
| HER2(+), anti-HER2 therapy(-)          | 45  | 12  | 4  | 1  | 0 |
| HER2(+), anti-HER2 targeted therapy(+) | 54  | 35  | 13 | 6  | 2 |

| Table S1 Primary tumor characteristics                                                                              |              |      |  |  |  |  |
|---------------------------------------------------------------------------------------------------------------------|--------------|------|--|--|--|--|
|                                                                                                                     | No           | %    |  |  |  |  |
| Mean age (range), years                                                                                             |              |      |  |  |  |  |
| At primary breast cancer diagnosis                                                                                  | 45.9 (23–78) |      |  |  |  |  |
| At the earliest relapse diagnosis                                                                                   | 49.6 (24–79) |      |  |  |  |  |
| Pathological T-stage                                                                                                |              |      |  |  |  |  |
| Tis                                                                                                                 | 5            | 1.2  |  |  |  |  |
| T1                                                                                                                  | 144          | 33.8 |  |  |  |  |
| T2                                                                                                                  | 222          | 52.1 |  |  |  |  |
| T3                                                                                                                  | 32           | 7.5  |  |  |  |  |
| T4                                                                                                                  | 3            | 0.7  |  |  |  |  |
| Tx                                                                                                                  | 20           | 4.7  |  |  |  |  |
| Pathological N-stage                                                                                                |              |      |  |  |  |  |
| N0                                                                                                                  | 141          | 33.1 |  |  |  |  |
| N1                                                                                                                  | 127          | 29.8 |  |  |  |  |
| N2                                                                                                                  | 72           | 16.9 |  |  |  |  |
| N3                                                                                                                  | 86           | 20.2 |  |  |  |  |
| Pathological type                                                                                                   |              |      |  |  |  |  |
| Invasive ductal carcinoma                                                                                           | 365          | 85.7 |  |  |  |  |
| Invasive lobular carcinoma                                                                                          | 15           | 3.5  |  |  |  |  |
| Other types                                                                                                         | 46           | 10.8 |  |  |  |  |
| ER status (10%)                                                                                                     |              |      |  |  |  |  |
| Positive                                                                                                            | 251          | 58.4 |  |  |  |  |
| Negative                                                                                                            | 179          | 41.6 |  |  |  |  |
| PR status (10%)                                                                                                     |              |      |  |  |  |  |
| Positive                                                                                                            | 213          | 50   |  |  |  |  |
| Negative                                                                                                            | 210          | 49.3 |  |  |  |  |
| Unknown                                                                                                             | 3            | 0.7  |  |  |  |  |
| HER2 status                                                                                                         |              |      |  |  |  |  |
| Positive                                                                                                            | 90           | 21.1 |  |  |  |  |
| Negative                                                                                                            | 273          | 64.1 |  |  |  |  |
| 2+/Unknown                                                                                                          | 63           | 14.8 |  |  |  |  |
| Abbreviations: ER, estrogen receptor; PR, progesterone receptor; HER2/neu, human epidermal growth factor receptor 2 |              |      |  |  |  |  |

**Table S2. Specific anatomical sites stratified by ER, PR, and HER2 status in primary tumor and metastasis**

|                  |               | ER      |      |                          |      |                          |      |       | PR      |      |                          |      |                          |     |       | HER2    |      |                          |      |                          |      |       |
|------------------|---------------|---------|------|--------------------------|------|--------------------------|------|-------|---------|------|--------------------------|------|--------------------------|-----|-------|---------|------|--------------------------|------|--------------------------|------|-------|
|                  |               | Stable§ |      | primary(+)/metastasis(-) |      | primary(-)/metastasis(+) |      | Total | Stable§ |      | primary(+)/metastasis(-) |      | primary(-)/metastasis(+) |     | Total | Stable§ |      | primary(+)/metastasis(-) |      | primary(-)/metastasis(+) |      | Total |
|                  |               | No.     | %    | No.                      | %    | No.                      | %    | No.   | No.     | %    | No.                      | %    | No.                      | %   | No.   | No.     | %    | No.                      | %    | No.                      | %    | No.   |
| All sites        |               | 336     | 78.9 | 63                       | 14.8 | 27                       | 6.3  | 426   | 282     | 66.8 | 117                      | 27.7 | 23                       | 5.5 | 422   | 273     | 88.3 | 17                       | 5.5  | 19                       | 6.1  | 309   |
| Lymphonode       | Local         | 55      | 84.6 | 8                        | 12.3 | 2                        | 3.1  | 65    | 43      | 67.2 | 19                       | 29.7 | 2                        | 3.1 | 64    | 44      | 86.3 | 4                        | 7.8  | 3                        | 5.9  | 51    |
|                  | Distant       | 38      | 67.9 | 14                       | 25   | 4                        | 7.1  | 56    | 38      | 67.9 | 17                       | 30.3 | 1                        | 1.8 | 56    | 33      | 78.6 | 4                        | 9.5  | 5                        | 11.9 | 42    |
| Skin/soft tissue | Local         | 101     | 83.5 | 11                       | 9.1  | 9                        | 7.4  | 121   | 78      | 65   | 31                       | 25.8 | 11                       | 9.2 | 120   | 87      | 93.6 | 3                        | 3.2  | 3                        | 3.2  | 93    |
|                  | Distant       | 3       | 60   | 2                        | 40   | 0                        | 0    | 5     | 2       | 40   | 3                        | 60   | 0                        | 0   | 5     | 2       | 66.7 | 1                        | 33.3 | 0                        | 0    | 3     |
| Breast           | Ipsilateral   | 12      | 100  | 0                        | 0    | 0                        | 0    | 12    | 8       | 66.7 | 4                        | 33.3 | 0                        | 0   | 12    | 8       | 88.9 | 0                        | 0    | 1                        | 11.1 | 9     |
|                  | Contralateral | 20      | 66.5 | 5                        | 16.7 | 5                        | 16.7 | 30    | 25      | 83.3 | 3                        | 10   | 2                        | 6.7 | 30    | 15      | 93.8 | 1                        | 6.2  | 0                        | 0    | 16    |
| Bone             |               | 9       | 90   | 1                        | 10   | 0                        | 0    | 10    | 5       | 50   | 4                        | 40   | 1                        | 10  | 10    | 6       | 75   | 1                        | 12.5 | 1                        | 12.5 | 8     |
| Lung             |               | 35      | 77.8 | 6                        | 13.3 | 4                        | 8.9  | 45    | 28      | 63.6 | 12                       | 27.3 | 4                        | 9.1 | 44    | 30      | 96.8 | 1                        | 3.2  | 0                        | 0    | 31    |
| Liver            |               | 42      | 75   | 12                       | 21.4 | 2                        | 3.6  | 56    | 35      | 62.5 | 19                       | 33.9 | 2                        | 3.6 | 56    | 34      | 82.9 | 1                        | 2.5  | 6                        | 14.6 | 41    |
| CNS              |               | 7       | 100  | 0                        | 0    | 0                        | 0    | 7     | 5       | 71.4 | 2                        | 28.6 | 0                        | 0   | 7     | 5       | 100  | 0                        | 0    | 0                        | 0    | 5     |
| Pleuar           |               | 6       | 85.7 | 1                        | 14.3 | 0                        | 0    | 7     | 5       | 71.4 | 2                        | 28.6 | 0                        | 0   | 7     | 3       | 100  | 0                        | 0    | 0                        | 0    | 3     |
| Other            |               | 8       | 66.7 | 3                        | 25   | 1                        | 8.3  | 12    | 10      | 83.4 | 1                        | 8.3  | 1                        | 8.3 | 12    | 5       | 71.4 | 1                        | 14.3 | 1                        | 14.3 | 7     |

Abbreviations: ER, estrogen receptor; PR, progesterone receptor; HER2, human epidermal growth factor receptor 2

§, persistant positive/negative in primary and metastatic sites

**Table S3. Association between the conversion of hormone receptor and clinicopathological variables (Multivariate Logistic Regression model)**

| Clinicopathological variables†                                                                                                                                      | ER conversion    |                |         |                       |                 |         |                       |                |         | PR conversion    |                |         |                       |                 |         |                       |        |         |
|---------------------------------------------------------------------------------------------------------------------------------------------------------------------|------------------|----------------|---------|-----------------------|-----------------|---------|-----------------------|----------------|---------|------------------|----------------|---------|-----------------------|-----------------|---------|-----------------------|--------|---------|
|                                                                                                                                                                     | Any discordance‡ |                |         | primary(+)-relapse(-) |                 |         | primary(-)-relapse(+) |                |         | Any discordance‡ |                |         | primary(+)-relapse(-) |                 |         | primary(-)-relapse(+) |        |         |
|                                                                                                                                                                     | OR               | 95% CI         | p-value | OR                    | 95% CI          | p-value | OR                    | 95% CI         | p-value | OR               | 95% CI         | p-value | OR                    | 95% CI          | p-value | OR                    | 95% CI | p-value |
| Age at diagnosis (continuous)                                                                                                                                       |                  |                | 0.726   |                       |                 | 0.482   |                       |                | 0.113   |                  |                | 0.067   |                       |                 | 0.142   |                       |        | 0.468   |
| Tumor size                                                                                                                                                          |                  |                | 0.606   |                       |                 | 0.855   |                       |                | 0.654   |                  |                | 0.13    |                       |                 | 0.457   |                       |        | 0.359   |
| T1 v Tis                                                                                                                                                            |                  |                | 0.1     |                       |                 | 0.327   |                       |                | 0.199   |                  |                | 0.384   |                       |                 | 0.737   |                       |        | 0.239   |
| T2 v Tis                                                                                                                                                            |                  |                | 0.182   |                       |                 | 0.659   |                       |                | 0.121   |                  |                | 0.684   |                       |                 | 0.522   |                       |        | 0.968   |
| T3 vTis                                                                                                                                                             |                  |                | 0.794   |                       |                 | 0.894   |                       |                | 0.548   |                  |                | 0.012   |                       |                 | 0.061   |                       |        | 0.054   |
| T4 vTis                                                                                                                                                             |                  |                | 0.403   |                       |                 | 0.53    |                       |                | 0.616   |                  |                | 0.258   |                       |                 | 0.322   |                       |        | 0.651   |
| Tx vTis                                                                                                                                                             |                  |                | 0.666   |                       |                 | 0.357   |                       |                | 0.659   |                  |                | 0.399   |                       |                 | 0.68    |                       |        | 0.43    |
| Lymphnode status                                                                                                                                                    |                  |                | 0.056   |                       |                 | 0.421   |                       |                | 0.074   |                  |                | 0.192   |                       |                 | 0.9     |                       |        | 0.06    |
| N1 v N0                                                                                                                                                             |                  |                | 0.096   |                       |                 | 0.174   |                       |                | 0.413   |                  |                | 0.088   |                       |                 | 0.708   |                       |        | 0.031   |
| N2 v N0                                                                                                                                                             |                  |                | 0.201   |                       |                 | 0.812   |                       |                | 0.108   |                  |                | 0.447   |                       |                 | 0.634   |                       |        | 0.385   |
| N3 v N0                                                                                                                                                             |                  |                | 0.04    |                       |                 | 0.179   |                       |                | 0.13    |                  |                | 0.199   |                       |                 | 0.94    |                       |        | 0.403   |
| Adjuvant chemotherapy (positive v negative)                                                                                                                         |                  |                | 0.148   |                       |                 | 0.447   |                       |                | 0.176   | 2.841            | 1.015 to 7.952 | 0.047   | 4.268                 | 1.217 to 14.965 | 0.023   |                       |        | 0.738   |
| Adjuvant endocrine therapy (positive v neg)                                                                                                                         | 2.211            | 1.342 to 3.643 | 0.002   | 5.967                 | 2.861 to 12.445 | 0.000   | 0.381                 | 0.167 to 0.868 | 0.022   | 5.491            | 3.400 to 8.870 | 0.000   | 8.627                 | 4.845 to 15.361 | 0.000   |                       |        | 0.543   |
| Adjuvant targeted therapy (positive v negative)                                                                                                                     |                  |                | 0.56    |                       |                 | 0.065   |                       |                | 0.181   |                  |                | 0.12    |                       |                 | 0.307   |                       |        | 0.29    |
| Adjuvant radiotherapy (positive v negative)                                                                                                                         |                  |                | 0.476   |                       |                 | 0.962   |                       |                | 0.285   |                  |                | 0.072   |                       |                 | 0.064   |                       |        | 0.738   |
| Abbreviations: ER, estrogen receptor; PR, progesterone receptor; OR, odds ratio, CI, confidence interval                                                            |                  |                |         |                       |                 |         |                       |                |         |                  |                |         |                       |                 |         |                       |        |         |
| ‡Persistent positive/negative in primary and metastatic sites                                                                                                       |                  |                |         |                       |                 |         |                       |                |         |                  |                |         |                       |                 |         |                       |        |         |
| † In Multivariate Logistic Regression model (forward stepwise procedure), the variables not included in the equation do not have Odds Ratio and Confidence Interval |                  |                |         |                       |                 |         |                       |                |         |                  |                |         |                       |                 |         |                       |        |         |

**Table S4.** Progression-free survival analysis stratified by HER2 status in metastasis and first-line anti-HER2 therapy (Multivariable Model)

| PFS (time since the earliest metastasis diagnosis )        | No. of patients | No. of progression | Adjusted HR *<br>95% CI | P value |
|------------------------------------------------------------|-----------------|--------------------|-------------------------|---------|
| HER2 status in metastasis and first-line anti-HER2 therapy |                 |                    |                         |         |
| HER2 (-), anti-HER2 therapy (-)                            | 256             | 205                | 1.754 (1.254 - 2.454)   | 0.001   |
| HER2 (-), anti-HER2 therapy (+)                            | 7               | 6                  | 1.540 (0.639 - 3.542)   | 0.35    |
| HER2 (+), anti-HER2 therapy (-)                            | 46              | 40                 | 1.821 (1.181 - 2.807)   | 0.007   |
| HER2 (+), anti-HER2 therapy (+)                            | 56              | 45                 | 1.000(reference)        |         |

\*After adjustment for age of first metastasis diagnosis (continuous), ER and PR status in metastatic site, site of metastasis (local and distant metastasis) first-line therapy (chemotherapy and endocrine therapy)

**Abbreviations:** HER2 human epidermal growth factor receptor 2; HR hazard ratio; CI confidential Interval; PFS progression-free survival

## **Supporting information**

**Figure. A1** Flow chart of the study

**Figure. A2** Progression-free survival analysis stratified by HER2 status in metastasis and first-line anti-HER2 therapy

**Table. S1** Primary tumor characteristics

**Table. S2** Specific anatomical sites stratified by ER, PR, and HER2 status in primary tumor and metastasis

**Table. S3** Association between the conversion of hormone receptor status and clinicopathological variables (multivariable model)

**Table. S4** Progression-free survival analysis stratified by HER2 status in metastasis and first-line anti-HER2 therapy (Multivariable Model)

Abbreviations: HER2 human epidermal growth factor receptor 2; HR hazard ratio; CI confidential Interval; PFS progression-free survival
